# Supplementary material
Source: PubMed Central journal article supplement (PMC5971612)
Supplement: AAC.00082-18_zac006187172s1.pdf [file AAC.00082-18_zac006187172s1.pdf]

1 **Supplemental Materials**

2 **List of Supplemental Tables:**

3 Supplemental Table 1: Summary of results of *in vitro* combination studies in the AML12-HBV10 cell culture system with  
4 rcDNA quantitation using bDNA assay

5 Supplemental Table 2: Summary of results of *in vitro* combination studies in the HepDE19 cell culture system with rcDNA  
6 quantitation using bDNA assay

7 Supplemental Table 3: Summary of results of *in vitro* combination studies in the HepBHAE82 cell culture system (precore  
8 RNA expression/qRT-PCR assay)

9 Supplemental Table 4: Summary of results of *in vitro* combination studies in HBV infected PHH (HBV DNA/RT-PCR assay)

10 Supplemental Table 5: Summary of results of *in vitro* combination studies in HBV infected PHH (HBsAg ELISA assay)

11 Supplemental Table 6: Summary of results of *in vitro* combination studies in HBV infected PHH (HBeAg ELISA assay)

12

13 **Supplemental Table 1: Summary of results of *in vitro* combination studies in the AML12-HBV10 cell culture system with**  
 14 **rcDNA quantitation using bDNA assay**

| <b>Inhibitor A</b> | <b>Inhibitor B</b> | <b>Inhibitor A EC<sub>50</sub> (μM)</b> | <b>Inhibitor B EC<sub>50</sub> (μM or μg/mL)</b> | <b>Synergy Volume (μM<sup>2</sup>%)*</b> | <b>Synergy Log Volume</b> | <b>Antagonism Volume (μM<sup>2</sup>%)*</b> | <b>Antagonism Log Volume</b> | <b>Conclusion</b> |
|--------------------|--------------------|-----------------------------------------|--------------------------------------------------|------------------------------------------|---------------------------|---------------------------------------------|------------------------------|-------------------|
| AB-423             | ETV                | 0.231                                   | 0.012                                            | 0                                        | 0                         | -1.29                                       | -0.19                        | Additive          |
| AB-423             | ARB-1740**         | 0.250                                   | 0.032                                            | 2.14                                     | 0.31                      | 0                                           | 0                            | Additive          |
| AB-423             | ARB-1467**         | 0.291                                   | 0.030                                            | 6.96                                     | 1                         | -0.81                                       | -0.12                        | Additive          |

15 \*At 99.9% confidence interval; \*\* μg/mL. Shown are the mean values of quadruplicate samples.

16 **Supplemental Table 2: Summary of results of *in vitro* combination studies in the HepDE19 cell culture system with rcDNA**  
 17 **quantitation using bDNA assay**

| <b>Inhibitor<br/>A</b> | <b>Inhibitor<br/>B</b> | <b>Inhibitor A<br/>EC<sub>50</sub> (μM)</b> | <b>Inhibitor B<br/>EC<sub>50</sub> (μg/mL)</b> | <b>Synergy<br/>Volume<br/>(μM<sup>2</sup>%)*</b> | <b>Synergy<br/>Log<br/>Volume</b> | <b>Antagonism<br/>Volume<br/>(μM<sup>2</sup>%)*</b> | <b>Antagonism<br/>Log Volume</b> | <b>Conclusion</b> |
|------------------------|------------------------|---------------------------------------------|------------------------------------------------|--------------------------------------------------|-----------------------------------|-----------------------------------------------------|----------------------------------|-------------------|
| AB-423                 | TDF                    | 0.454                                       | 0.088                                          | 12.07                                            | 1.73                              | 0                                                   | 0                                | Additive          |

18 \*At 99.9% confidence interval. Shown are the mean values of quadruplicate samples

19 **Supplemental Table 3: Summary of results of *in vitro* combination studies in the HepBHAc82 cell culture system (precore**  
 20 **RNA expression/qRT-PCR assay)**

| <b>Inhibitor A</b> | <b>Inhibitor B</b> | <b>Inhibitor A EC<sub>50</sub> (μM)</b> | <b>Inhibitor B EC<sub>50</sub> (nM or μg/mL)</b> | <b>Synergy Volume (μM<sup>2</sup>%)*</b> | <b>Synergy Log Volume</b> | <b>Antagonism Volume (μM<sup>2</sup>%)*</b> | <b>Antagonism Log Volume</b> | <b>Conclusion</b> |
|--------------------|--------------------|-----------------------------------------|--------------------------------------------------|------------------------------------------|---------------------------|---------------------------------------------|------------------------------|-------------------|
| AB-423             | ETV                | 0.658                                   | 0.300                                            | 679.15                                   | 169.79                    | 0                                           | 0                            | Synergistic       |
| AB-423             | ARB-1740**         | 0.087                                   | 0.006                                            | 123.96                                   | 30.95                     | -0.26                                       | -0.06                        | Synergistic       |

21 \*at 99.9% confidence interval; \*\* μg/mL. Shown are the mean values of quadruplicate samples

22 **Supplemental Table 4: Summary of results of *in vitro* combination studies in HBV infected PHH (HBV DNA/qPCR assay)**

| <b>Inhibitor A</b> | <b>Inhibitor B</b> | <b>Inhibitor A EC<sub>50</sub> (μM) (HBV DNA)</b> | <b>Inhibitor B EC<sub>50</sub> (nM or IU/mL) (HBV DNA)<sup>#</sup></b> | <b>Synergy Volume (μM<sup>2</sup>%)<sup>*</sup></b> | <b>Synergy Log Volume</b> | <b>Antagonism Volume (μM<sup>2</sup>%)<sup>*</sup></b> | <b>Antagonism Log Volume</b> | <b>Conclusion</b> |
|--------------------|--------------------|---------------------------------------------------|------------------------------------------------------------------------|-----------------------------------------------------|---------------------------|--------------------------------------------------------|------------------------------|-------------------|
| AB-423             | Interferon-α2a     | 0.92 μM                                           | 0.62, 2.15 IU/mL                                                       | 78.7                                                | 17.9                      | -11.2                                                  | 2.5                          | Moderate Synergy  |
| AB-423             | TAF                | 0.88 μM                                           | 0.56, 0.41 nM                                                          | 56.0                                                | 12.7                      | -8.4                                                   | 1.9                          | Moderate Synergy  |

23 \*at 95% confidence interval; \*\* μg/mL; #duplicate experimental results

24 **Supplemental Table 5: Summary of results of *in vitro* combination studies in HBV infected PHH (HBsAg ELISA assay)**

| <b>Inhibitor A</b> | <b>Inhibitor B</b> | <b>Inhibitor A EC<sub>50</sub> (μM) (HBsAg)</b> | <b>Inhibitor B EC<sub>50</sub> (nM or IU/mL) (HBsAg)<sup>#</sup></b> | <b>Synergy Volume (μM<sup>2</sup>%)<sup>*</sup></b> | <b>Synergy Log Volume</b> | <b>Antagonism Volume (μM<sup>2</sup>%)<sup>*</sup></b> | <b>Antagonism Log Volume</b> | <b>Conclusion</b> |
|--------------------|--------------------|-------------------------------------------------|----------------------------------------------------------------------|-----------------------------------------------------|---------------------------|--------------------------------------------------------|------------------------------|-------------------|
| AB-423             | Interferon-α2a     | 4.08 μM                                         | 13.2, 13.8 IU/mL                                                     | 63.1                                                | 14.4                      | 0                                                      | 0                            | Moderate Synergy  |
| AB-423             | TAF                | 7.8 μM                                          | >100, >100 nM                                                        | 117.1                                               | 26.7                      | -0.24                                                  | 0.1                          | Strong Synergy    |

25 \*at 95% confidence interval; # duplicate experimental results

26 **Supplemental Table 6: Summary of results of *in vitro* combination studies in HBV infected PHH (HBeAg ELISA assay)**

| <b>Inhibitor A</b> | <b>Inhibitor B</b> | <b>Inhibitor A EC<sub>50</sub> (μM) (HBeAg)</b> | <b>Inhibitor B EC<sub>50</sub> (nM or IU/mL) (HBeAg)<sup>#</sup></b> | <b>Synergy Volume (μM<sup>2</sup>%)<sup>*</sup></b> | <b>Synergy Log Volume</b> | <b>Antagonism Volume (μM<sup>2</sup>%)<sup>*</sup></b> | <b>Antagonism Log Volume</b> | <b>Conclusion</b> |
|--------------------|--------------------|-------------------------------------------------|----------------------------------------------------------------------|-----------------------------------------------------|---------------------------|--------------------------------------------------------|------------------------------|-------------------|
| AB-423             | Interferon-α2a     | 4.27 μM                                         | 12.66, 10.24 IU/mL                                                   | 155.1                                               | 35.3                      | 0                                                      | 0                            | Strong Synergy    |
| AB-423             | TAF                | 8.58 μM                                         | >100, >100 nM                                                        | 17.9                                                | 4.1                       | 0                                                      | 0                            | Additive          |

27 \*at 95% confidence interval; # duplicate experimental results
